# Supplementary material for: Mitochondrial dysfunction promotes the transition of precursor to terminally exhausted T cells through HIF-1α-mediated glycolytic reprogramming
Source: PubMed Central journal article supplement (PMC10611730; doi:10.1038/s41467-023-42634-3), 2023-10-27
Supplement: 41467_2023_42634_MOESM2_ESM.pdf [file 41467_2023_42634_MOESM2_ESM.pdf]

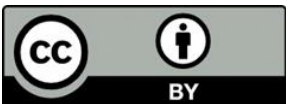

**Open Access** This file is licensed under a Creative Commons Attribution 4.0 International License, which permits use, sharing, adaptation, distribution and reproduction in any medium or format, as long as you give appropriate credit to the original author(s) and the source, provide a link to the Creative Commons license, and indicate if changes were made. In the cases where the authors are anonymous, such as is the case for the reports of anonymous peer reviewers, author attribution should be to 'Anonymous Referee' followed by a clear attribution to the source work. The images or other third party material in this file are included in the article's Creative Commons license, unless indicated otherwise in a credit line to the material. If material is not included in the article's Creative Commons license and your intended use is not permitted by statutory regulation or exceeds the permitted use, you will need to obtain permission directly from the copyright holder. To view a copy of this license, visit <http://creativecommons.org/licenses/by/4.0/>.

**Editorial Note:** This manuscript has been previously reviewed at another journal that is not operating a transparent peer review scheme. This document only contains reviewer comments and rebuttal letters for versions considered at *Nature Communications*.

Reviewers' Comments:

Reviewer #4:

Remarks to the Author:

The authors have included all my comments except the experiments concerning CAR-T cells. Considering that is not a key point in the manuscript and that I agree with their response to this part, I am happy to endorse the publication of this article in Nature communications.

Reviewer #5:

Remarks to the Author:

I commend the authors for their efforts in reconciling their observations with those of the field. They have addressed my concerns, and I consider the study adequate for publication.

## REVIEWERS' COMMENTS

### **Reviewer #4** (Remarks to the Author):

The authors have included all my comments except the experiments concerning CAR-T cells. Considering that is not a key point in the manuscript and that I agree with their response to this part, I am happy to endorse the publication of this article in Nature communications.

Response: Thank you.

### **Reviewer #5** (Remarks to the Author):

I commend the authors for their efforts in reconciling their observations with those of the field. They have addressed my concerns, and I consider the study adequate for publication.

Response: Thank you.
