# Supplementary material for: Mitochondrial dysfunction promotes the transition of precursor to terminally exhausted T cells through HIF-1α-mediated glycolytic reprogramming
Source: PubMed Central journal article supplement (PMC10611730; doi:10.1038/s41467-023-42634-3), 2023-10-27
Supplement: 41467_2023_42634_MOESM3_ESM.pdf [file 41467_2023_42634_MOESM3_ESM.pdf]

## Reporting Summary

Nature Portfolio wishes to improve the reproducibility of the work that we publish. This form provides structure for consistency and transparency in reporting. For further information on Nature Portfolio policies, see our [Editorial Policies](#) and the [Editorial Policy Checklist](#).

### Statistics

For all statistical analyses, confirm that the following items are present in the figure legend, table legend, main text, or Methods section.

- | n/a                                 | Confirmed                                                                                                                                                                                                                                                                                      |
|-------------------------------------|------------------------------------------------------------------------------------------------------------------------------------------------------------------------------------------------------------------------------------------------------------------------------------------------|
| <input type="checkbox"/>            | <input checked="" type="checkbox"/> The exact sample size ( $n$ ) for each experimental group/condition, given as a discrete number and unit of measurement                                                                                                                                    |
| <input type="checkbox"/>            | <input checked="" type="checkbox"/> A statement on whether measurements were taken from distinct samples or whether the same sample was measured repeatedly                                                                                                                                    |
| <input type="checkbox"/>            | <input checked="" type="checkbox"/> The statistical test(s) used AND whether they are one- or two-sided<br><i>Only common tests should be described solely by name; describe more complex techniques in the Methods section.</i>                                                               |
| <input checked="" type="checkbox"/> | <input type="checkbox"/> A description of all covariates tested                                                                                                                                                                                                                                |
| <input checked="" type="checkbox"/> | <input type="checkbox"/> A description of any assumptions or corrections, such as tests of normality and adjustment for multiple comparisons                                                                                                                                                   |
| <input type="checkbox"/>            | <input checked="" type="checkbox"/> A full description of the statistical parameters including central tendency (e.g. means) or other basic estimates (e.g. regression coefficient) AND variation (e.g. standard deviation) or associated estimates of uncertainty (e.g. confidence intervals) |
| <input checked="" type="checkbox"/> | <input type="checkbox"/> For null hypothesis testing, the test statistic (e.g. $F$ , $t$ , $r$ ) with confidence intervals, effect sizes, degrees of freedom and $P$ value noted<br><i>Give <math>P</math> values as exact values whenever suitable.</i>                                       |
| <input checked="" type="checkbox"/> | <input type="checkbox"/> For Bayesian analysis, information on the choice of priors and Markov chain Monte Carlo settings                                                                                                                                                                      |
| <input checked="" type="checkbox"/> | <input type="checkbox"/> For hierarchical and complex designs, identification of the appropriate level for tests and full reporting of outcomes                                                                                                                                                |
| <input checked="" type="checkbox"/> | <input type="checkbox"/> Estimates of effect sizes (e.g. Cohen's $d$ , Pearson's $r$ ), indicating how they were calculated                                                                                                                                                                    |

*Our web collection on [statistics for biologists](#) contains articles on many of the points above.*

### Software and code

Policy information about [availability of computer code](#)

Data collection

Data analysis

For manuscripts utilizing custom algorithms or software that are central to the research but not yet described in published literature, software must be made available to editors and reviewers. We strongly encourage code deposition in a community repository (e.g. GitHub). See the Nature Portfolio [guidelines for submitting code & software](#) for further information.

### Data

Policy information about [availability of data](#)

All manuscripts must include a [data availability statement](#). This statement should provide the following information, where applicable:

- Accession codes, unique identifiers, or web links for publicly available datasets
- A description of any restrictions on data availability
- For clinical datasets or third party data, please ensure that the statement adheres to our [policy](#)

The bulk and single cell RNA sequencing data generated in this study have been deposited in the Gene Expression Omnibus (GEO) database under accession codes GSE212298 (<https://www.ncbi.nlm.nih.gov/geo/query/acc.cgi?acc=GSM6523603>), GSE214003 (<https://www.ncbi.nlm.nih.gov/geo/query/acc.cgi?acc=GSE214003>), and GSE213847 (<https://www.ncbi.nlm.nih.gov/geo/query/acc.cgi?acc=GSE213847>). The remaining data are available within the Article, Supplementary Information

or Source Data file. Source data are provided with this paper.

## Human research participants

Policy information about [studies involving human research participants and Sex and Gender in Research](#).

Reporting on sex and gender

N/A

Population characteristics

N/A

Recruitment

N/A

Ethics oversight

N/A

Note that full information on the approval of the study protocol must also be provided in the manuscript.

## Field-specific reporting

Please select the one below that is the best fit for your research. If you are not sure, read the appropriate sections before making your selection.

Life sciences  Behavioural & social sciences  Ecological, evolutionary & environmental sciences

For a reference copy of the document with all sections, see [nature.com/documents/nr-reporting-summary-flat.pdf](https://www.nature.com/documents/nr-reporting-summary-flat.pdf)

## Life sciences study design

All studies must disclose on these points even when the disclosure is negative.

Sample size

No statistical methods were used to pre-determine sample sizes but our sample sizes are similar to those reported in previous publications (Vaeth et al., Immunity 2016 and Hochrein et al Cell Metabolism 2022). For all in vivo and in vitro experiments, minimum 3 biological replicates and minimum 2 independent experiments were performed. Samples size and number of independent experiments are indicated in the figure legends.

Data exclusions

No data were excluded from analysis.

Replication

All experiments were repeated (> 2 times) and reproducible. scRNA-Seq was not repeated, but validated by FACS analysis.

Randomization

Randomization was not relevant to this study. Mice were grouped by genotype/treatment and treated equally.

Blinding

No blinding was performed as mice were grouped by genotype/and treated equally. No human subjects were investigated.

## Behavioural & social sciences study design

All studies must disclose on these points even when the disclosure is negative.

Study description

N/A

Research sample

N/A

Sampling strategy

N/A

Data collection

N/A

Timing

N/A

Data exclusions

N/A

Non-participation

N/A

Randomization

N/A

# Ecological, evolutionary & environmental sciences study design

All studies must disclose on these points even when the disclosure is negative.

|                          |                                  |
|--------------------------|----------------------------------|
| Study description        | <input type="text" value="N/A"/> |
| Research sample          | <input type="text" value="N/A"/> |
| Sampling strategy        | <input type="text" value="N/A"/> |
| Data collection          | <input type="text" value="N/A"/> |
| Timing and spatial scale | <input type="text" value="N/A"/> |
| Data exclusions          | <input type="text" value="N/A"/> |
| Reproducibility          | <input type="text" value="N/A"/> |
| Randomization            | <input type="text" value="N/A"/> |
| Blinding                 | <input type="text" value="N/A"/> |

Did the study involve field work?  Yes  No

## Reporting for specific materials, systems and methods

We require information from authors about some types of materials, experimental systems and methods used in many studies. Here, indicate whether each material, system or method listed is relevant to your study. If you are not sure if a list item applies to your research, read the appropriate section before selecting a response.

### Materials & experimental systems

| n/a                                 | Included in the study                                           |
|-------------------------------------|-----------------------------------------------------------------|
| <input type="checkbox"/>            | <input checked="" type="checkbox"/> Antibodies                  |
| <input type="checkbox"/>            | <input checked="" type="checkbox"/> Eukaryotic cell lines       |
| <input checked="" type="checkbox"/> | <input type="checkbox"/> Palaeontology and archaeology          |
| <input type="checkbox"/>            | <input checked="" type="checkbox"/> Animals and other organisms |
| <input checked="" type="checkbox"/> | <input type="checkbox"/> Clinical data                          |
| <input checked="" type="checkbox"/> | <input type="checkbox"/> Dual use research of concern           |

### Methods

| n/a                                 | Included in the study                              |
|-------------------------------------|----------------------------------------------------|
| <input checked="" type="checkbox"/> | <input type="checkbox"/> ChIP-seq                  |
| <input type="checkbox"/>            | <input checked="" type="checkbox"/> Flow cytometry |
| <input checked="" type="checkbox"/> | <input type="checkbox"/> MRI-based neuroimaging    |

## Antibodies

### Antibodies used

Goat polyclonal anti-hamster IgG, MP Biomedicals, Cat#: 56984 1:10000  
 Hamster monoclonal anti-mouse CD3, Bio X Cell, Cat#: BE0001-1; Clone 145-2C1 (0.5ug/ml)  
 Hamster monoclonal anti-mouse CD28, Bio X Cell, Cat#: BE00015-1; Clone 37.51 (1ug/ml)  
 anti-FcgRII/FcgRIII antibody, Bio X Cell, Cat#: BE0307; Clone 2.4G2 1:200  
 Rat anti-CD4 (in vivo depletion), Bio X Cell, Cat# BE0003-1; Clone GK1.5  
 Rat anti-CD44(FITC-conjugated), Biolegend Cat#: 103006; Clone IM7 1:400  
 Rat anti-CD4(APC-Cy7-conjugated), BD Biosciences, Cat#: 552501; Clone GK1.5 1:400  
 Rat anti-CD19(APC-Cy7-conjugated), BD Biosciences, Cat#: 557655; Clone 1D3 1:400  
 Rat anti-CD44(PE-conjugated), Thermo Fischer Scientific, Cat#: 12-0441-82; Clone IM7 1:400  
 Rat anti-CD44(APC-conjugated), Biolegend, Cat#: 103012; Clone IM7 1:400  
 Rat anti-CD8a(BV421-conjugated), Biolegend, Cat#: 100753; Clone 53-5.7 1:400  
 Rat anti-CD8a (PerCP-Cy5.5-conjugated), Biolegend, Cat#: 100734; Clone 53-5.7 1:400  
 Rat anti-CD8a(APC-conjugated), Biolegend, Cat#: 100712; Clone 53-5.7 1:400  
 Rat anti-Tim3(PE-conjugated), Biolegend, Cat#: 119704; Clone RMT3-23 1:400  
 Rat anti-Tim3(APC-conjugated), Biolegend, Cat#: 119705; Clone RMT3-23 1:400  
 Rat anti-Tim3(PE-Cy7-conjugated), Biolegend, Cat#: 119716; Clone RMT3-23 1:400  
 Rat anti-Tim3(BV711-conjugated), Biolegend, Cat#: 119727; Clone RMT3-23 1:400  
 Mouse anti-Slamf6(Ly108) (APC-conjugated), Biolegend, Cat#: 134610; Clone 330-AJ 1:200  
 Mouse anti- Slamf6(Ly108) (BV711-conjugated), BD Biosciences, Cat#: 740823; Clone 13G3 1:200  
 Rat anti-PD1(BV605-conjugated), Biolegend, Cat#: 135219; Clone 29F.1A12 1:400

Rat anti-CD62L (PerCP-Cy5.5-conjugated), Biolegend, Cat#: 104432; Clone MEL-14 1:200  
 Rat anti-Granzyme A (PerCP-eF710-conjugated), Thermo Fischer Scientific, Cat#: 46-5831-82; Clone 3G8.5 1:200  
 Rat anti-Lag3 (BV650-conjugated) Biolegend Cat#: 125227; Clone C9B7W 1:200  
 Rat anti-IFN-g (APC-conjugated) Biolegend Cat#: 505810; Clone XMG1.2 1:200  
 Rat anti-IL-2 (BV421-conjugated) Biolegend Cat#: 503826; Clone JES6-5H4 1:200  
 Rat anti-TNF- $\alpha$ (PE-Cy7-conjugated) Biolegend Cat#: 119716; Clone RMT3-23 1:200  
 Mouse anti- HIF-1 $\alpha$  (Alexa Fluor 647-conjugated) Biolegend Cat#: 359705; Clone 546-16 1:100  
 Rabbit anti-HIF-1 $\alpha$  (HRP-conjugated) Cell Signaling Cat#: 36169S; Clone D1S7W 1:1000  
 Goat anti-Rabbit-HRP Bio-Rad Cat#: STAR208P; Polyclonal 1:2000  
 Mouse anti-beta-actin-HRP Biolegend Cat#: 643807; Clone 2F1-1 1:5000  
 Mouse anti- HIF-1 $\alpha$  (APC-conjugated) Thermo Fischer Scientific Cat#: 17-7528-82; Clone Mgc3 1:100  
 Rat anti-CD4(APC-Cy7-conjugated) BD Biosciences Cat#: 552051; Clone GK1.5 1:400  
 TotalSeq™-A0837 anti-mouse IL-33R $\alpha$  (IL1RL1, ST2) Biolegend Cat#: 145317; Clone DIH9 1:400  
 TotalSeq™-A0250 anti-mouse/human KLRG1 (MAFA) Biolegend Cat#: 138431; Clone 2F1/KLRG1 1:400  
 TotalSeq™-A0846 anti-mouse CD185 (CXCR5) Biolegend Cat#: 145535; Clone L138D7 1:400  
 TotalSeq™-A0847 anti-mouse CD278 (ICOS) Biolegend Cat#: 117409; Clone 7E.17G9 1:400  
 TotalSeq™-A0201 anti-mouse CD103 Biolegend Cat#: 121437; Clone 2E7 1:400  
 TotalSeq™-A0421 anti-mouse CD49b Biolegend Cat#: 103523; Clone HM $\alpha$ 2 1:400  
 TotalSeq™-C0595 anti-mouse CD11a Antibody Biolegend Cat#: 101131; Clone M17/4 1:400  
 TotalSeq™-A0191 anti-mouse/rat/human CD27 Biolegend Cat#: 124235; Clone LG.3A10 1:400  
 TotalSeq™-A0198 anti-mouse CD127 (IL-7R $\alpha$ ) Biolegend Cat#: 135045; Clone A7R34 1:400  
 TotalSeq™-A0807 anti-mouse CD200R (OX2R) Biolegend Cat#: 123913; Clone OX-100 1:400  
 TotalSeq™-A0301 anti-mouse Hashtag 1 Biolegend Cat#: 155801; Clone M1/42; 30-F11 1:400  
 TotalSeq™-A0302 anti-mouse Hashtag 2 Biolegend Cat#: 155803; Clone M1/42; 30-F11 1:400  
 Mouse anti-SDHA(Alexa Fluor 488 conjugated), Abcam, Cat#: ab154473; Clone 2E3GC12FB2AE2 1:1000  
 Mouse anti-SDHB(Alexa Fluor 488 conjugated), Abcam, Cat#: ab197902; Clone 21A11AE7 1:1000  
 Mouse anti-ATP5A1(CoraLite Plus 488 conjugated), ProteinTech Cat#: CLL488-66037; Clone 1B10H3 1:1000  
 Mouse anti-MTCO1(Alexa Fluor 647 conjugated), Abcam, Cat#: ab198600; Clone 1D6E1A8 1:1000  
 Rabbit anti-PGC-1 $\alpha$  (unconjugated), ThermoFisher, Cat#:PA5-72948; Polyclonal 1:1000  
 Rabbit anti-TFAM (unconjugated), ThermoFisher, Cat#:PA5-29571; Polyclonal 1:1000

## Validation

All antibodies used are commercially available and have been validated by the manufacturers.

## BioLegend:

<https://www.biolegend.com/en-us/quality/quality-control>

Specificity testing of 1-3 target cell types with either single- or multi-color analysis (including positive and negative cell types). Once specificity is confirmed, each new lot must perform with similar intensity to the in-date reference lot. Brightness (MFI) is evaluated from both positive and negative populations.

Each lot product is validated by QC testing with a series of titration dilutions.

## Abcam:

<https://www.abcam.com/en-it/products/primary-antibodies/alexa-fluor-488-anti-sdha-antibody-epr9043b-ab309691>

<https://www.abcam.com/products/primary-antibodies/alexa-fluor-488-sdha-antibody-21a11ae7-ab197902.html>

<https://www.abcam.com/products/primary-antibodies/alexa-fluor-647-mtco1-antibody-1d6e1a8-ab198600.html>

## Cell Signalling:

<https://www.cellsignal.com/products/primary-antibodies/hif-1a-d1s7w-xp-rabbit-mab/36169>

## BD:

<https://www.bdbiosciences.com/en-de/products/reagents/flow-cytometry-reagents/research-reagents/single-color-antibodies-ruo/apc-cy-7-rat-anti-mouse-cd19.557655>

<https://www.bdbiosciences.com/en-us/products/reagents/flow-cytometry-reagents/research-reagents/single-color-antibodies-ruo/bv711-mouse-anti-mouse-ly-108.740823>

<https://www.bdbiosciences.com/en-pl/products/reagents/flow-cytometry-reagents/research-reagents/single-color-antibodies-ruo/apc-cy-7-rat-anti-mouse-cd4.552051>

## eBioscience / Invitrogen / Thermo Fisher:

<https://www.thermofisher.com/antibody/product/CD44-Antibody-clone-IM7-Monoclonal/12-0441-82>

<https://www.thermofisher.com/antibody/product/Granzyme-A-Antibody-clone-GzA-3G8-5-Monoclonal/46-5831-82>

<https://www.thermofisher.com/antibody/product/HIF-1-alpha-Antibody-clone-Mgc3-Monoclonal/17-7528-82>

<https://www.thermofisher.com/antibody/product/PGC1-alpha-Antibody-Polyclonal/PA5-72948>

<https://www.thermofisher.com/antibody/product/TFAM-Antibody-Polyclonal/PA5-29571>

## Bio-Rad :

<https://www.bio-rad-antibodies.com/polyclonal/rabbit-lapine-igg-antibody-star208.html?f=hrp>

## ProteinTech:

<https://www.ptglab.com/products/ATP5A1-Antibody-CL488-66037.htm>

## Eukaryotic cell lines

Policy information about [cell lines and Sex and Gender in Research](#)

|                                                                   |                                                                                                                                                                                                                                              |
|-------------------------------------------------------------------|----------------------------------------------------------------------------------------------------------------------------------------------------------------------------------------------------------------------------------------------|
| Cell line source(s)                                               | Platinum-E retroviral packaging cell line was bought from Cell Biolabs Inc. (Cat# RV-101). The MC38-OVA and B16F10-OVA cell lines were kind gifts from DR. Edgar Serfling (University of Würzburg) and DR. Tobias Bald (University of Bonn). |
| Authentication                                                    | No specific authentication of the cell lines was performed.                                                                                                                                                                                  |
| Mycoplasma contamination                                          | Cell lines were only used for experiments if tested negative for mycoplasma contaminations.                                                                                                                                                  |
| Commonly misidentified lines (See <a href="#">ICLAC</a> register) | No commonly misidentified lines were used in this study.                                                                                                                                                                                     |

## Palaeontology and Archaeology

|                                                                                                                                                 |                                                                                                                                                                               |
|-------------------------------------------------------------------------------------------------------------------------------------------------|-------------------------------------------------------------------------------------------------------------------------------------------------------------------------------|
| Specimen provenance                                                                                                                             | N/A                                                                                                                                                                           |
| Specimen deposition                                                                                                                             | N/A                                                                                                                                                                           |
| Dating methods                                                                                                                                  | N/A                                                                                                                                                                           |
| <input type="checkbox"/> Tick this box to confirm that the raw and calibrated dates are available in the paper or in Supplementary Information. |                                                                                                                                                                               |
| Ethics oversight                                                                                                                                | <i>Identify the organization(s) that approved or provided guidance on the study protocol, OR state that no ethical approval or guidance was required and explain why not.</i> |

Note that full information on the approval of the study protocol must also be provided in the manuscript.

## Animals and other research organisms

Policy information about [studies involving animals; ARRIVE guidelines](#) recommended for reporting animal research, and [Sex and Gender in Research](#)

|                         |                                                                                                                                                                                                                                                                                                                                                                                                                                                                                                                                                                                                                                                                                                                                                                                                                                                                                                                                                                                                                                                                                                                                                                                                                                                                                                                                                                                                                                                                                                                                                              |
|-------------------------|--------------------------------------------------------------------------------------------------------------------------------------------------------------------------------------------------------------------------------------------------------------------------------------------------------------------------------------------------------------------------------------------------------------------------------------------------------------------------------------------------------------------------------------------------------------------------------------------------------------------------------------------------------------------------------------------------------------------------------------------------------------------------------------------------------------------------------------------------------------------------------------------------------------------------------------------------------------------------------------------------------------------------------------------------------------------------------------------------------------------------------------------------------------------------------------------------------------------------------------------------------------------------------------------------------------------------------------------------------------------------------------------------------------------------------------------------------------------------------------------------------------------------------------------------------------|
| Laboratory animals      | All mice were bred and maintained under specific pathogen free (SPF) conditions in the Center for Experimental Medicine (ZEMM) or the Institute for Systems Immunology at the Julius-Maximilians University of Würzburg. Mice were maintained on a 12/12 h light/dark cycle at between 20-24 °C in individually ventilated cages. Mice had access to standard chow (Ssniff; cat# V1534) and autoclaved water ad libitum and health status of the animals was inspected daily by the responsible caretakers. Hygiene status of the sentinel mice was monitored quarterly according to the FELASA guidelines. Both male and female mice between 8 and 24 weeks of age at the time of the experiment were used for the in vitro experiments described in this study. For chronic LCMV infection models, male mice between 8 and 12 weeks of age were used.<br><br>Strains: C57BL/6 (JAX strain 000664), CD45.1+ (strain 002014), P14 (strain 037394), OT-1 (strain 003831), Ubi-GFP (strain 004353), tdTomato (Kastenmüller et al.), mito-Dendra2 (strain 018397), Hif1afl/fl (strain 007561), Tfamfl/fl (strain 026123), Rag1-/- (strain 002216) and Cd4Cre mice (strain 017336) were purchased from the Jackson Laboratories (JAX) and/or maintained at our institution. Slc25a3fl/fl (mPIC) mice and Nfatc1fl/fl mice were kindly provided by Jeffery D. Molkenin (Cincinnati Children's Hospital Medical Center, OH, USA) and Anjana Rao (La Jolla Institute for Immunology, CA, USA). All animals used in this study were on a C57BL/6 genetic background. |
| Wild animals            | No wild animals were used in this study                                                                                                                                                                                                                                                                                                                                                                                                                                                                                                                                                                                                                                                                                                                                                                                                                                                                                                                                                                                                                                                                                                                                                                                                                                                                                                                                                                                                                                                                                                                      |
| Reporting on sex        | Both male and female mice between 8 and 24 weeks of age at the time of the experiment were used for the in vitro experiments described in this study. For chronic LCMV infection models, male mice between 8 and 12 weeks of age were used.                                                                                                                                                                                                                                                                                                                                                                                                                                                                                                                                                                                                                                                                                                                                                                                                                                                                                                                                                                                                                                                                                                                                                                                                                                                                                                                  |
| Field-collected samples | No field-collected samples were used in this study.                                                                                                                                                                                                                                                                                                                                                                                                                                                                                                                                                                                                                                                                                                                                                                                                                                                                                                                                                                                                                                                                                                                                                                                                                                                                                                                                                                                                                                                                                                          |
| Ethics oversight        | All protocols used for animal experimentation were approved by the animal ethics/welfare committee of the government of Lower Franconia, Germany                                                                                                                                                                                                                                                                                                                                                                                                                                                                                                                                                                                                                                                                                                                                                                                                                                                                                                                                                                                                                                                                                                                                                                                                                                                                                                                                                                                                             |

Note that full information on the approval of the study protocol must also be provided in the manuscript.

## Clinical data

Policy information about [clinical studies](#)

All manuscripts should comply with the ICMJE [guidelines for publication of clinical research](#) and a completed [CONSORT checklist](#) must be included with all submissions.

|                             |     |
|-----------------------------|-----|
| Clinical trial registration | N/A |
| Study protocol              | N/A |

Data collection Outcomes 

## Dual use research of concern

Policy information about [dual use research of concern](#)

### Hazards

Could the accidental, deliberate or reckless misuse of agents or technologies generated in the work, or the application of information presented in the manuscript, pose a threat to:

- | No                                  | Yes                      |                            |
|-------------------------------------|--------------------------|----------------------------|
| <input checked="" type="checkbox"/> | <input type="checkbox"/> | Public health              |
| <input checked="" type="checkbox"/> | <input type="checkbox"/> | National security          |
| <input checked="" type="checkbox"/> | <input type="checkbox"/> | Crops and/or livestock     |
| <input checked="" type="checkbox"/> | <input type="checkbox"/> | Ecosystems                 |
| <input checked="" type="checkbox"/> | <input type="checkbox"/> | Any other significant area |

### Experiments of concern

Does the work involve any of these experiments of concern:

- | No                                  | Yes                      |                                                                             |
|-------------------------------------|--------------------------|-----------------------------------------------------------------------------|
| <input checked="" type="checkbox"/> | <input type="checkbox"/> | Demonstrate how to render a vaccine ineffective                             |
| <input checked="" type="checkbox"/> | <input type="checkbox"/> | Confer resistance to therapeutically useful antibiotics or antiviral agents |
| <input checked="" type="checkbox"/> | <input type="checkbox"/> | Enhance the virulence of a pathogen or render a nonpathogen virulent        |
| <input checked="" type="checkbox"/> | <input type="checkbox"/> | Increase transmissibility of a pathogen                                     |
| <input checked="" type="checkbox"/> | <input type="checkbox"/> | Alter the host range of a pathogen                                          |
| <input checked="" type="checkbox"/> | <input type="checkbox"/> | Enable evasion of diagnostic/detection modalities                           |
| <input checked="" type="checkbox"/> | <input type="checkbox"/> | Enable the weaponization of a biological agent or toxin                     |
| <input checked="" type="checkbox"/> | <input type="checkbox"/> | Any other potentially harmful combination of experiments and agents         |

## ChIP-seq

### Data deposition

- Confirm that both raw and final processed data have been deposited in a public database such as [GEO](#).
- Confirm that you have deposited or provided access to graph files (e.g. BED files) for the called peaks.

Data access links   
*May remain private before publication.*Files in database submission Genome browser session   
(e.g. [UCSC](#))

### Methodology

Replicates Sequencing depth Antibodies Peak calling parameters Data quality Software

## Flow Cytometry

### Plots

Confirm that:

- The axis labels state the marker and fluorochrome used (e.g. CD4-FITC).
- The axis scales are clearly visible. Include numbers along axes only for bottom left plot of group (a 'group' is an analysis of identical markers).
- All plots are contour plots with outliers or pseudocolor plots.
- A numerical value for number of cells or percentage (with statistics) is provided.

### Methodology

- Sample preparation
- Instrument
- Software
- Cell population abundance
- Gating strategy
- Tick this box to confirm that a figure exemplifying the gating strategy is provided in the Supplementary Information.

## Magnetic resonance imaging

### Experimental design

- Design type
- Design specifications
- Behavioral performance measures

### Acquisition

- Imaging type(s)
- Field strength
- Sequence & imaging parameters
- Area of acquisition
- Diffusion MRI  Used  Not used

### Preprocessing

- Preprocessing software
- Normalization
- Normalization template
- Noise and artifact removal
- Volume censoring

### Statistical modeling & inference

- Model type and settings
- Effect(s) tested
- Specify type of analysis:  Whole brain  ROI-based  Both

Statistic type for inference  
(See [Eklund et al. 2016](#))

N/A

Correction

N/A

## Models & analysis

- | n/a                                 | Involvement in the study                                              |
|-------------------------------------|-----------------------------------------------------------------------|
| <input checked="" type="checkbox"/> | <input type="checkbox"/> Functional and/or effective connectivity     |
| <input checked="" type="checkbox"/> | <input type="checkbox"/> Graph analysis                               |
| <input checked="" type="checkbox"/> | <input type="checkbox"/> Multivariate modeling or predictive analysis |
